# Supplementary material for: Enhanced photoluminescence of pyrrolic-nitrogen enriched graphene quantum dots
Source: Royal Society of Chemistry journal article supplement (doi:10.1039/c5ra07745a), 2015-01-01
Supplement: c5ra07745a1.pdf [file c5ra07745a1.pdf]

## Supporting Information

# Enhanced Photoluminescence of Pyrrolic-Nitrogen Enriched Graphene Quantum Dots

Ya-Nan Hao, Hui-Lin Guo\*, Lei Tian, Xiaofeng Kang

Key Laboratory of Synthetic and Natural Functional Molecule Chemistry (Ministry of Education),  
College of Chemistry and Materials Science, Northwest University, Xi'an 710127, P. R. China

Corresponding author: Fax: +86 29 81535026. E-mail address: hlguo@nwu.edu.cn (H.-L. Guo)

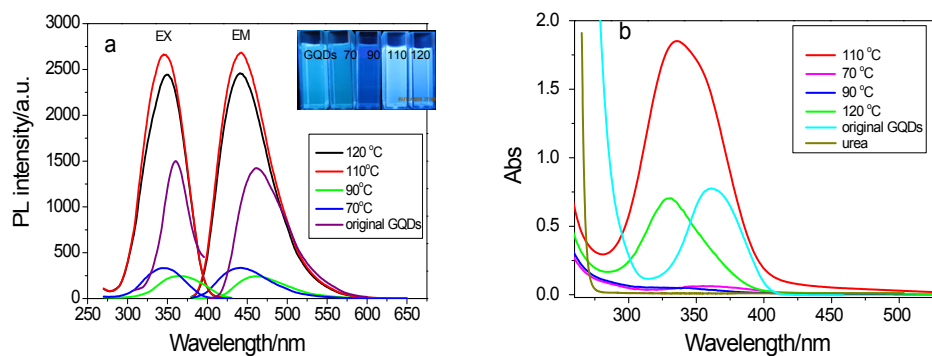

**Figure S1.** The PL emission and PL excitation (a) and UV-vis absorption (b) spectra of original GQDs and N-GQDs solutions prepared under different temperature (70, 90, 110, 120 °C). The inset in (a) shows photographs the solutions of N-GQDs under UV irradiation at 365 nm.

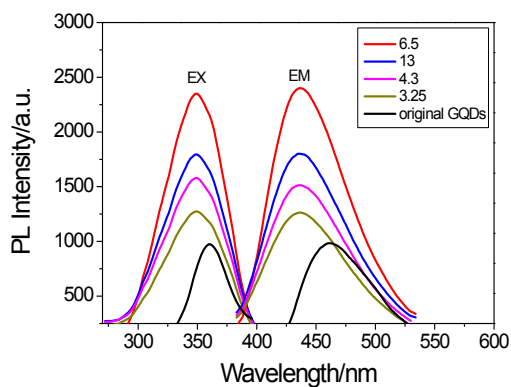

**Figure S2.** The PL emission and PL excitation spectra of N-GQDs solutions prepared at different urea concentration (3.25, 4.3, 6.5, 13 mol L<sup>-1</sup>).

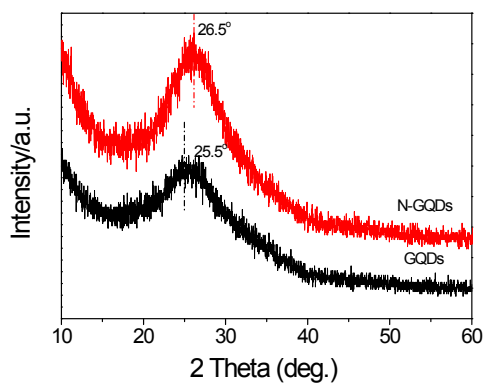

**Figure S3.** XRD patterns of GQDs and N-GQDs.

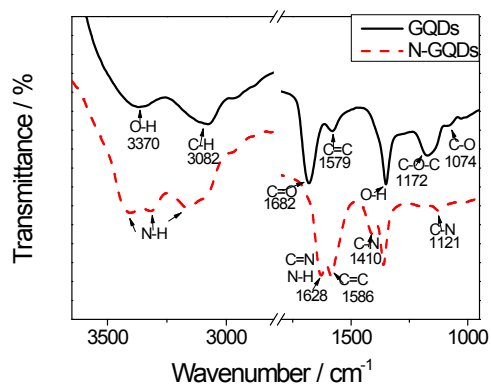

**Figure S4.** FT-IR spectra of GQDs and N-GQDs.

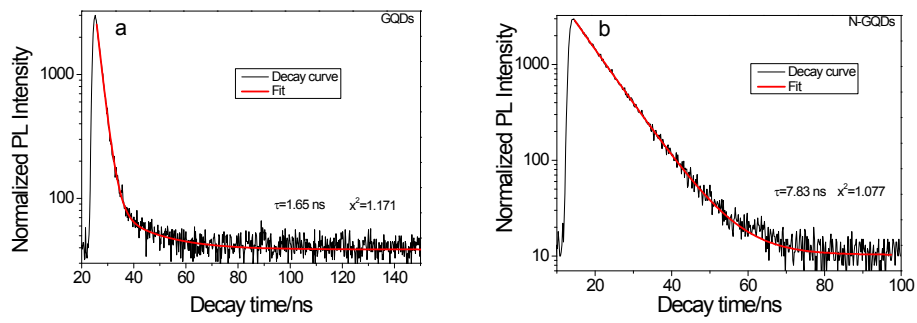

**Figure S5.** PL decay of GQDs (a) and N-GQDs (b) after dialysis.

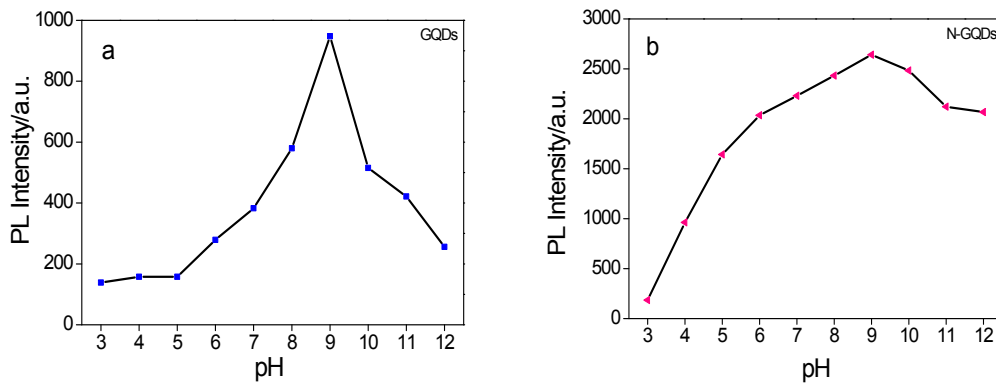

**Figure S6.** PL response of GQDs (a) and N-GQDs (b) under different pH values.

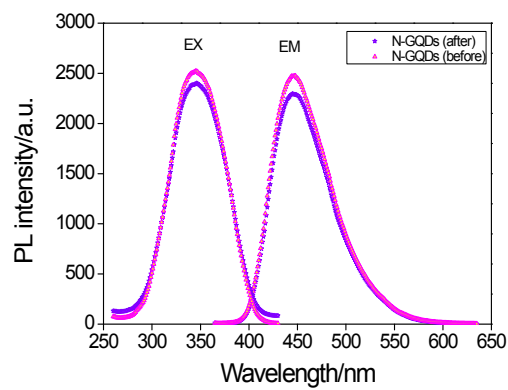

**Figure S7** The PL spectra of N-GQDs solution stored before and after one month.

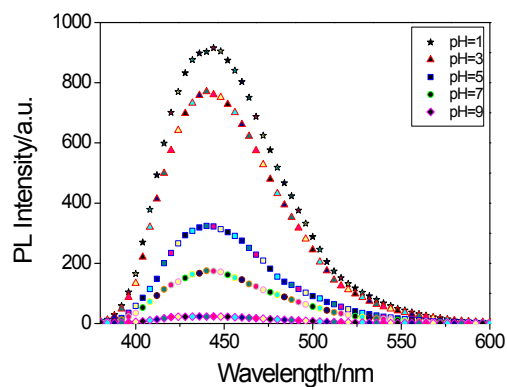

**Figure S8.** The PL spectra of the mixture solutions of citric acid and urea heated in the oven at 110 °C for 3 h. Before heating, the mixture solutions were firstly adjusted to different pH values using 0.25 mol L<sup>-1</sup> NaOH.

**Table S1.** A summary of the morphologies, nitrogen/carbon atomic ratio content and quantum yield of N-doped GQDs and C-dots synthesized via typical synthetic routes.

| Routes       | Methods                                               | Samples                | Materials                           | Temperature (°C)/Time(h) | Size (nm) | Height (nm) | N/C atomic ratio | Zeta (mV) | Color with UV lamp irradiation        | QY (%) | $\tau_{ave}$ (ns)                         | ref.      |
|--------------|-------------------------------------------------------|------------------------|-------------------------------------|--------------------------|-----------|-------------|------------------|-----------|---------------------------------------|--------|-------------------------------------------|-----------|
| Up-down      | Hydrothermal treatment followed by thermal annealing. | NH <sub>2</sub> -GQDs* | OGSs <sup>a</sup> , ammonia         | 70-150/5                 | 2.5       | 1.13        | 0.022 ~ 0.12     | —         | violet to yellow                      | 19-29  | 5.1×10 <sup>8</sup> , 2.2×10 <sup>8</sup> | S1        |
|              | Hydrothermal                                          | GQDs*                  | OGSs <sup>b</sup> , ammonia         | 200/10~12                | 1.5~5     | 1.5~1.9     | No present       | —         | green                                 | ~7.5   | —                                         | S2        |
|              | Hydrothermal                                          | NH <sub>2</sub> -GQDs* | GQDs <sup>d</sup> , ammonia         | 200/10                   | 3~9       | 0.4~2       | 0.1205           | + 3       | blue                                  | ~16.4  | —                                         | S3        |
|              | Hydrothermal                                          | N-GQDs                 | GO, ammonia                         | 180/12                   | 2-6       | 0.5-3       | 0.1788           | —         | blue                                  | 24.6   | —                                         | S4        |
|              | Hydrothermal                                          | N-C-dots               | Monkey grass                        | 180/6                    | 1~4       | —           | No present       | + 30.2    | bright blue                           | —      | —                                         | S5        |
|              | Refluxing                                             | rGQDs* <sup>c</sup>    | GQDs, N <sub>2</sub> H <sub>4</sub> | 95/1~60(min)             | 2~5.5     | 0.6~2       | 0.0792           | —         | —                                     | 10.3   | —                                         | S6        |
|              | Electrochemical                                       | N-GQDs*                | Graphene film, TBAP <sup>f</sup>    | ±3.0(V)/0.5(V/s)         | 2~5       | 1~2.5       | 0.0428           | —         | blue                                  | —      | —                                         | S7        |
|              | Solvothermal                                          | GQDs*                  | GO, DMF                             | 200/8                    | 2~5.5     | 0.6~2       | 0.1926           | —         | Blue in DMF; yellowish-green in water | 5.1    | —                                         | S6        |
| Solvothermal | N-GQDs                                                | GO, DMF                | 200/4.5                             | 1-6                      | 0.5-1     | —           | -21              | green     | 31                                    | 6.27   | S8                                        |           |
| Bottom-up    | Hydrothermal                                          | GQDs-U-4**             | CA, urea                            | 160/4                    | 1.8~3.4   | 0.5~2       | ~0.2             | —         | blue                                  | 78     | 8                                         | S9        |
|              | Microwave                                             | C-dots*                | CA, urea                            | 750(W)/4~5(min)          | 1~5       | 1~4         | 0.429            | + 88.1    | blue~yellow                           | ~14    | 2.11(15.9%); 5.97(84.1%)                  | S10       |
|              | Pyrolysis followed by hydrothermal                    | N-GQDs**               | CA, urea                            | 110/3                    | 5~9       | 1~2         | 0.06             | -24.9     | blue                                  | ~24    | 7.83                                      | This work |

\* Emission wavelength excitation-dependent; \*\* Emission wavelength excitation-independent.

<sup>a</sup> OGSs ( oxidized graphene sheets) were obtained by Hummers' method at 80 °C for 8h. <sup>b</sup> GSs (graphene sheets) were derived from thermal reduction of graphene oxide (GO) sheets, and then the GSs were oxidized in concentrated H<sub>2</sub>SO<sub>4</sub> and HNO<sub>3</sub> to form OGSs. <sup>c</sup> rGQDs, reduced GQDs. <sup>d</sup> GQDs were obtained by microwave assisted refluxing of GO suspension mixed with H<sub>2</sub>SO<sub>4</sub> and HNO<sub>3</sub>. <sup>e</sup> TBAP, tetrabutylammonium perchlorate.

**Table S2.** Quantum yields of GQDs and N-GQDs (before and after centrifugation) using quinine sulfate as a reference.

| Sample                         | Integrated emission intensity ( $I$ ) | Abs. at 360 nm ( $A$ ) | Refractive index of solvent ( $\eta$ ) | Quantum Yield ( $QY$ ) |
|--------------------------------|---------------------------------------|------------------------|----------------------------------------|------------------------|
| Quinine sulfate                | 147637                                | 0.057                  | 1.33                                   | 54% (known)            |
| GQDs (before centrifugation)   | 32580                                 | 0.070                  | 1.33                                   | 9.7%                   |
| GQDs (after centrifugation)    | 25525                                 | 0.057                  | 1.33                                   | 9.3%                   |
| N-GQDs (before centrifugation) | 87448                                 | 0.074                  | 1.33                                   | 24.6%                  |
| N-GQDs (after centrifugation)  | 77382                                 | 0.065                  | 1.33                                   | 24.8%                  |

### Quantum yields (QY) measurements

Quinine sulfate in 0.1 M H<sub>2</sub>SO<sub>4</sub> (QY=0.54) was chosen as standards. The quantum yields of GQDs and N-GQDs were calculated according to:

$$\phi_x = \phi_{st} (I_x / I_{st}) (\eta_x^2 / \eta_{st}^2) (A_{st} / A_x)$$

Where  $\Phi$  is the quantum yield,  $I$  is the measured integrated emission intensity,  $\eta$  is the refractive index of the solvent, and  $A$  is the optical density. The subscript “st” refers to the reference standard with known quantum yield and “x” for the sample. In order to minimize re-absorption effects, absorbencies in the 10 mm fluorescence cuvette were kept under 0.10 at the excitation wavelength (360 nm).

### References

- S1 P. H. Matter, L. Zhang and U. S. Ozkan, *J. Catal.*, 2006, **239**, 83-96.
- S2 D. Y. Pan, L. Guo, J. C. Zhang, C. Xi, Q. Xue, H. Huang, J. H. Li, Z. W. Zhang, W. J. Yu, Z. W. Chen, Z. Li and M. H. Wu. *J. Mater. Chem.*, 2012, **22**, 3314-3318.
- S3 H. Sun, N. Gao, L. Wu, J. Ren, W. Wei and X. Qu, *Chem-Eur. J.* 2013, **19**, 13362-13368
- S4 C. Hu, Y. Liu, Y. Yang, J. Cui, Z. Huang, Y. Wang, L. Yang, H. wang, Y. Xiao and J. Rong. *J. Mater. Chem.* 2013, **1**, 39-42.

- S5 H. Zhang, Y. Li, X. Liu, P. Liu, Y. Wang, T. An, H. Yang, D. Jing and H. Zhao. *Environ. Sci. Tech. Lett.* 2013, **1**, 87-91.
- S6 Y. Feng, J. Zhao, X. Yan, F. Tang and Q. Xue. *Carbon*, 2014, **66**, 334-339.
- S7 Y. Li, Y. Zhao, H. Cheng, Y. Hu, G. Shi, L. Dai and L. Qu. *J. Am. Chem. Soc.* 2011, **134**, 15-18.
- S8 Q. Liu, B. Guo, Z. Rao, B. Zhang and J. R. Gong. *Nano Lett.* 2013, **13**, 2436-2441.
- S9 D. Qu, M. Zheng, L. Zhang, H. Zhao, Z. Xie, X. Jing, R. E. Haddad, H. Fan and Z. Sun, *Sci. Rep.*, 2014, **4**, 1-9.
- S10 S. Qu, X. Wang, Q. Lu, X. Liu and L. Wang. *Angew. Chem.*, 2012, **124**, 12381-12384
